# Supplementary material for: Phospholipid-based self-assembled mesophase systems for light-activated drug delivery
Source: Royal Society of Chemistry journal article supplement (doi:10.1039/c5cp01229e), 2015-01-01
Supplement: c5cp01229e1.pdf [file c5cp01229e1.pdf]

## Electronic Supplementary Information

### Phospholipid-based self-assembled mesophase systems for light-activated drug delivery

Joanne D. Du<sup>1</sup>, Wye-Khay Fong<sup>1,2</sup>, Stefan Salentinig<sup>1</sup>, Suzanne Caliph<sup>1</sup>, Adrian Hawley<sup>3</sup> and Ben J. Boyd<sup>1,4</sup>

<sup>1</sup>*Drug Delivery, Disposition and Dynamics, Monash Institute of Pharmaceutical Sciences, Monash University (Parkville Campus), 381 Royal Parade, Parkville, VIC, 3052, Australia*

<sup>2</sup>*Food and Soft Materials Science, Institute of Food, Nutrition & Health, ETH Zurich, Schmelzbergstrasse 9, 8092 Zürich, Switzerland*

<sup>3</sup>*SAXS/WAXS beamline, Australian Synchrotron, 800 Blackburn Rd, Clayton, VIC 3168, Australia*

<sup>4</sup>*ARC Centre of Excellence in Convergent Bio-Nano Science and Technology, Monash Institute of Pharmaceutical Sciences, Monash University (Parkville Campus), 381 Royal Parade, Parkville, VIC 3052, Australia*

\* Corresponding author details:

Postal Address: Monash Institute of Pharmaceutical Sciences, Monash University (Parkville Campus), 381 Royal Parade, Parkville, VIC 3052, Australia

Telephone: +61 3 99039112; Fax: +61 3 99039583; Email: [ben.boyd@monash.edu](mailto:ben.boyd@monash.edu)

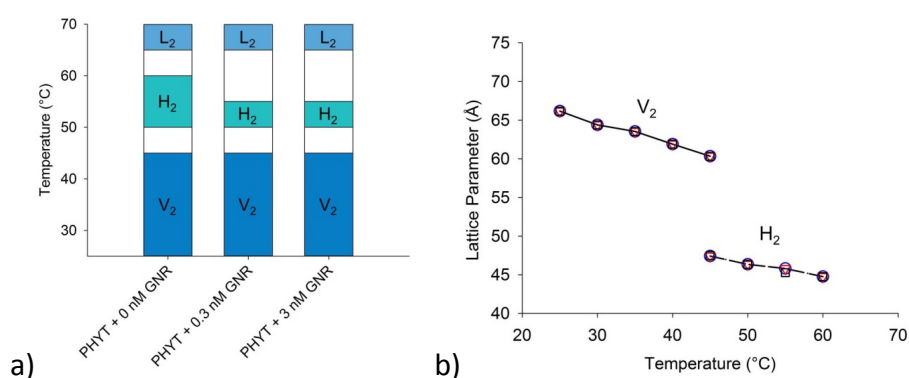

SI 1 Effect of GNR on equilibrium structure of PHYT bulk system. a) Temperature dependent phase diagram and b) the lattice parameter of the lipid systems in the presence of 0 nM (○), 0.3 nM (▽) and 3 nM (□) GNR is plotted against thermostat-controlled temperature.

Corresponding phases are indicated as follow: dashed line for H<sub>2</sub> phase and a solid line for V<sub>2</sub> phase.

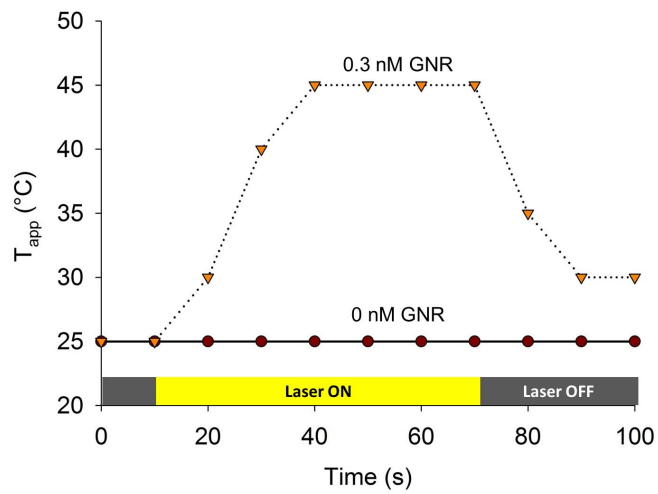

SI 2

Effect of NIR laser irradiation on apparent temperature ( $T_{app}$ ) of the PHYT system containing 0 nM (●) and 0.3 nM (▼) GNR.

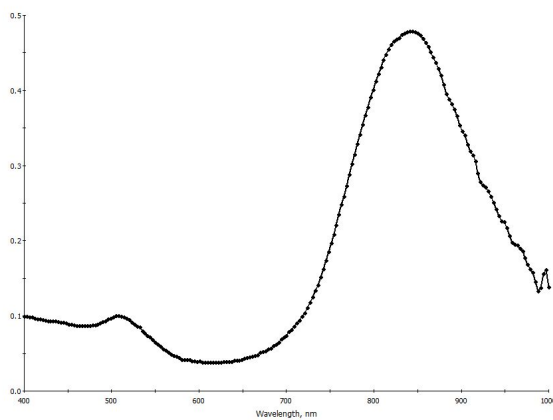

SI 3 UV/Vis absorbance of GNR solutions with the maximum SPR peak of 825 nm.
